# Supplementary material for: Gender-Specific Associations between Low Skeletal Muscle Mass and Albuminuria in the Middle-Aged and Elderly Population
Source: PubMed Central journal article supplement — Int J Med Sci. 2017 Sep 3;14(11):1054–64. doi: 10.7150/ijms.20286 (PMC5666535; doi:10.7150/ijms.20286), 2017-09-03
Supplement: ijmsv14p1054s1.pdf [file ijmsv14p1054s1.pdf]

**Supplement Table 1. Subgroup Analysis of Non-hypertension Patients: Univariate and Multivariate Analyses of Factors Associated with Increased Albuminuria.**

|                          | Men (n = 314)        |         |                     |         | Women (n = 330)     |         |                    |         |
|--------------------------|----------------------|---------|---------------------|---------|---------------------|---------|--------------------|---------|
|                          | Univariate Model     |         | Multivariate Model  |         | Univariate Model    |         | Multivariate Model |         |
|                          | OR (95% CI)          | p-value | OR (95% CI)         | p-value | OR (95% CI)         | p-value | OR (95% CI)        | p-value |
| Age                      |                      | 0.638   |                     |         |                     | 0.554   |                    |         |
| 50-59                    | 1.00 (Reference)     |         |                     |         | 1.00 (Reference)    |         |                    |         |
| 60-69                    | 1.116 [0.451,2.761]  | 0.811   |                     |         | 1.29 [0.48,3.467]   | 0.613   |                    |         |
| 70-79                    | 1.712 [0.661,4.434]  | 0.267   |                     |         | 1.316 [0.422,4.099] | 0.635   |                    |         |
| 80-                      | 1.985 [0.393,10.014] | 0.406   |                     |         | 2.813 [0.69,11.472] | 0.149   |                    |         |
| BMI                      |                      | 0.075   |                     |         |                     | 0.430   |                    |         |
| < 18.5                   | 1.00 (Reference)     |         |                     |         | 1.00 (Reference)    |         |                    |         |
| 18.5 ≤ <23.0             | 1.47 [0.178,12.161]  | 0.721   |                     |         | 0.853 [0.099,7.375] | 0.885   |                    |         |
| 23.0 ≤ <25               | 0.585 [0.061,5.642]  | 0.642   |                     |         | 0.518 [0.053,5.059] | 0.571   |                    |         |
| ≥ 25                     | 2.641 [0.317,21.99]  | 0.369   |                     |         | 1.36 [0.16,11.565]  | 0.778   |                    |         |
| Current Smoking          |                      | 0.134   |                     |         |                     | 0.909   |                    |         |
| (Current vs. Never)      | 2.202 [0.615,7.878]  | 0.224   |                     |         | 0.794 [0.1,6.284]   | 0.827   |                    |         |
| (Past vs. Never)         | 1.026 [0.269,3.909]  | 0.970   |                     |         | 1.489 [0.178,12.43] | 0.713   |                    |         |
| Alcohol intake >3 Unit/d | 0.319 [0.074,1.379]  | 0.126   |                     |         | NA                  | NA      |                    |         |
| Physical activity        | 1.36 [0.597,3.098]   | 0.464   |                     |         | 0.984 [0.355,2.726] | 0.974   |                    |         |
| Diabetes                 | 5.896 [2.459,14.137] | <.0001  | 5.265[2.013,13.774] | 0.0007  | 1.051 [0.233,4.74]  | 0.948   |                    |         |

|                                   |                      |       |                    |       |  |                     |       |  |  |
|-----------------------------------|----------------------|-------|--------------------|-------|--|---------------------|-------|--|--|
| Dyslipidaemia                     | 2.297 [1.043,5.057]  | 0.038 | 2.046[0.82,5.106]  | 0.125 |  | 1.476 [0.618,3.529] | 0.381 |  |  |
| History of CVD                    | 1.664 [0.459,6.031]  | 0.438 |                    |       |  | NA                  | NA    |  |  |
| Metabolic syndrome                | 2.595 [1.189,5.664]  | 0.016 | 1.046[0.382,2.859] | 0.931 |  | 1.103 [0.46,2.649]  | 0.825 |  |  |
| Vitamin D deficiency (<20 ng/ml)) | 1.034 [0.972,1.099]  | 0.285 |                    |       |  | 1.02 [0.955,1.089]  | 0.561 |  |  |
| Estrogen replacement              | -                    | -     | -                  | -     |  | 0.257 [0.034,1.95]  | 0.188 |  |  |
| eGFR <60ml/min/1.73m <sup>2</sup> | 0.986 [0.962,1.011]  | 0.272 |                    |       |  | 1.022 [0.994,1.05]  | 0.127 |  |  |
| Skeletal muscle mass              |                      | 0.236 |                    |       |  |                     | 0.569 |  |  |
| Normal SMI                        | 1.00 (Reference)     |       |                    |       |  | 1.00 (Reference)    |       |  |  |
| Mild LMM                          | 1.597 [0.67,3.807]   | 0.290 |                    |       |  | 1.592 [0.674,3.764] | 0.289 |  |  |
| Severe LMM                        | 3.462 [0.657,18.238] | 0.142 |                    |       |  | NA                  | NA    |  |  |

**Supplement Table 2. Subgroup Analysis of Diabetes Patients: Univariate and Multivariate Analyses of Factors associated with Increased Albuminuria.**

|                          | Men (n = 75)         |         |                    |         | Women (n = 83)      |         |                    |         |
|--------------------------|----------------------|---------|--------------------|---------|---------------------|---------|--------------------|---------|
|                          | Univariate Model     |         | Multivariate Model |         | Univariate Model    |         | Multivariate Model |         |
|                          | OR (95% CI)          | p-value | OR (95% CI)        | p-value | OR (95% CI)         | p-value | OR (95% CI)        | p-value |
| Age                      |                      | 0.997   |                    |         |                     | NA      |                    |         |
| 50-59                    | 1.00 (Reference)     |         |                    |         | NA                  | NA      |                    |         |
| 60-69                    | 0.952 [0.317,2.858]  | 0.931   |                    |         | NA                  | NA      |                    |         |
| 70-79                    | 1.091 [0.304,3.91]   | 0.894   |                    |         | NA                  | NA      |                    |         |
| 80-                      | NA                   | NA      |                    |         | NA                  | NA      |                    |         |
| BMI                      |                      | 0.377   |                    |         |                     |         |                    |         |
| < 18.5                   | NA                   |         |                    |         | 1.00 (Reference)    | 0.529   |                    |         |
| 18.5 ≤ <23.0             | 1.00 (Reference)     |         |                    |         | 0.105 [0.005,2.41]  | 0.158   |                    |         |
| 23.0 ≤ <25               | 0.545 [0.158,1.885]  | 0.338   |                    |         | 0.235 [0.012,4.621] | 0.340   |                    |         |
| ≥ 25                     | 0.463 [0.149,1.434]  | 0.181   |                    |         | 0.171 [0.009,3.126] | 0.233   |                    |         |
| Current Smoking          |                      | 0.665   |                    |         |                     | 0.624   |                    |         |
| (Current vs. Never)      | 2.139 [0.375,12.202] | 0.392   |                    |         | 2.4 [0.408,14.107]  | 0.332   |                    |         |
| (Past vs. Never)         | 1.615 [0.291,8.966]  | 0.583   |                    |         | 1.2 [0.127,11.374]  | 0.873   |                    |         |
| Alcohol intake >3 Unit/d | 1.985 [0.588,6.697]  | 0.269   |                    |         | NA                  | NA      |                    |         |
| Physical activity        | 0.835 [0.276,2.519]  | 0.748   |                    |         | 2.1 [0.484,9.107]   | 0.321   |                    |         |

|                                   |                     |       |   |   |  |                      |       |  |  |
|-----------------------------------|---------------------|-------|---|---|--|----------------------|-------|--|--|
| Hypertension                      | 1.05 [0.396,2.784]  | 0.922 |   |   |  | 2.582 [0.529,12.608] | 0.241 |  |  |
| Dyslipidaemia                     | 1.324 [0.438,3.999] | 0.619 |   |   |  | 1.366 [0.328,5.692]  | 0.668 |  |  |
| History of CVD                    | 1.026 [0.334,3.155] | 0.963 |   |   |  | 2.4 [0.544,10.595]   | 0.247 |  |  |
| Metabolic syndrome                | 1.319 [0.44,3.955]  | 0.620 |   |   |  | 0.687 [0.129,3.673]  | 0.660 |  |  |
| Vitamin D deficiency (<20 ng/ml)) | 1.025[0.935,1.124]  | 0.595 |   |   |  | 1.006[0.938,1.078]   | 0.872 |  |  |
| Estrogen replacement              | –                   | –     | – | – |  | 0.774[0.087,6.872]   | 0.818 |  |  |
| eGFR <60ml/min/1.73m <sup>2</sup> | 0.995[0.972,1.018]  | 0.658 |   |   |  | 0.974[0.943,1.006]   | 0.111 |  |  |
| Skeletal muscle mass              |                     | 0.218 |   |   |  |                      | 0.617 |  |  |
| Normal SMI                        | 1.00 (Reference)    |       |   |   |  | 1.00 (Reference)     |       |  |  |
| Mild LMM                          | 1.435[0.517,3.982]  | 0.487 |   |   |  | 1.224[0.345,4.35]    | 0.754 |  |  |
| Severe LMM                        | 7.75[0.732,82.017]  | 0.088 |   |   |  | 0.396[0.044,3.532]   | 0.406 |  |  |

**Supplement Table 3. Subgroup Analysis of Metabolic Syndrome Patients: Univariate and Multivariate Analyses of Factors Associated with Increased Albuminuria.**

|                          | Men (n = 175)        |         |                     |         | Women (n = 285)      |         |                    |         |
|--------------------------|----------------------|---------|---------------------|---------|----------------------|---------|--------------------|---------|
|                          | Univariate Model     |         | Multivariate Model  |         | Univariate Model     |         | Multivariate Model |         |
|                          | OR (95% CI)          | p-value | OR (95% CI)         | P-value | OR (95% CI)          | p-value | OR (95% CI)        | p-value |
| Age                      |                      | 0.901   |                     |         |                      | 0.618   |                    |         |
| 50-59                    | 1.00 (Reference)     |         |                     |         | 1.00 (Reference)     |         |                    |         |
| 60-69                    | 1.14 [0.489,2.66]    | 0.761   |                     |         | 0.815 [0.318,2.085]  | 0.669   |                    |         |
| 70-79                    | 1.444 [0.558,3.742]  | 0.449   |                     |         | 0.899 [0.357,2.265]  | 0.821   |                    |         |
| 80-                      | NA                   | NA      |                     |         | 1.905 [0.512,7.085]  | 0.336   |                    |         |
| BMI                      |                      |         |                     |         |                      | 0.667   |                    |         |
| < 18.5                   | 1.00 (Reference)     |         |                     |         | 1.00 (Reference)     |         |                    |         |
| 18.5 ≤ <23.0             | NA                   | NA      |                     |         | 0.213 [0.016,2.783]  | 0.238   |                    |         |
| 23.0 ≤ <25               | NA                   | NA      |                     |         | 0.323 [0.027,3.897]  | 0.373   |                    |         |
| ≥ 25                     | NA                   | NA      |                     |         | 0.282 [0.024,3.25]   | 0.309   |                    |         |
| Current Smoking          |                      | 0.318   |                     |         |                      | 0.561   |                    |         |
| (Current vs. Never)      | 3.332 [0.701,15.852] | 0.130   |                     |         | 1.132 [0.244,5.253]  | 0.874   |                    |         |
| (Past vs. Never)         | 2.793 [0.599,13.027] | 0.191   |                     |         | 2.452 [0.474,12.686] | 0.284   |                    |         |
| Alcohol intake >3 Unit/d | 0.985 [0.369,2.628]  | 0.975   |                     |         | NA                   | NA      |                    |         |
| Physical activity        | 0.964 [0.415,2.24]   | 0.933   |                     |         | 1.829 [0.799,4.186]  | 0.152   |                    |         |
| Diabetes                 | 2.991 [1.415,6.321]  | 0.004   | 2.826 [1.306,6.112] | 0.008   | 1.339 [0.621,2.887]  | 0.455   |                    |         |

|                                   |                     |       |                        |       |  |                     |       |  |  |
|-----------------------------------|---------------------|-------|------------------------|-------|--|---------------------|-------|--|--|
| Hypertension                      | 1.38 [0.64,2.976]   | 0.410 |                        |       |  | 1.887 [0.823,4.327] | 0.133 |  |  |
| Dyslipidaemia                     | 1.235 [0.432,3.531] | 0.693 |                        |       |  | 1.464 [0.668,3.208] | 0.341 |  |  |
| History of CVD                    | 1.757 [0.7,4.409]   | 0.230 |                        |       |  | 0.703 [0.203,2.436] | 0.577 |  |  |
| Vitamin D deficiency (<20 ng/ml)) | 1.03 [0.968,1.095]  | 0.354 |                        |       |  | 0.988 [0.936,1.043] | 0.664 |  |  |
| Estrogen replacement              | –                   | –     | –                      | –     |  | 0.542 [0.158,1.862] | 0.330 |  |  |
| eGFR <60ml/min/1.73m <sup>2</sup> | 0.975 [0.953,0.998] | 0.031 | 0.976<br>[0.953,0.998] | 0.034 |  | 0.993 [0.972,1.014] | 0.507 |  |  |
| Skeletal muscle mass              |                     | 0.055 |                        |       |  |                     | 0.911 |  |  |
| Normal SMI                        | 1.00 (Reference)    |       |                        |       |  | 1.00 (Reference)    |       |  |  |
| Mild LMM                          | 0.909 [0.405,2.042] | 0.817 |                        |       |  | 1.183 [0.549,2.551] | 0.667 |  |  |
| Severe LMM                        | 3.646 [1.169,11.37] | 0.025 |                        |       |  | 1.062 [0.39,2.894]  | 0.905 |  |  |
